# Supplementary material for: Global warming promotes biological invasion of a honey bee pest
Source: PubMed Central journal article supplement — Glob Chang Biol. 2019 Sep 11;25(11):3642–55. doi: 10.1111/gcb.14791 (PMC6856679; doi:10.1111/gcb.14791), 2019-09-11

**Supplement Figure S4** Global maps of monthly pupal performance of *Aethina tumida* under current climatic conditions. Red to orange colours indicate highly suitable areas, yellow to green colours indicate marginally suitable areas and blue to grey colours indicate unsuitable areas. Non-vegetated areas are masked in white.

Pupal performance; Jan

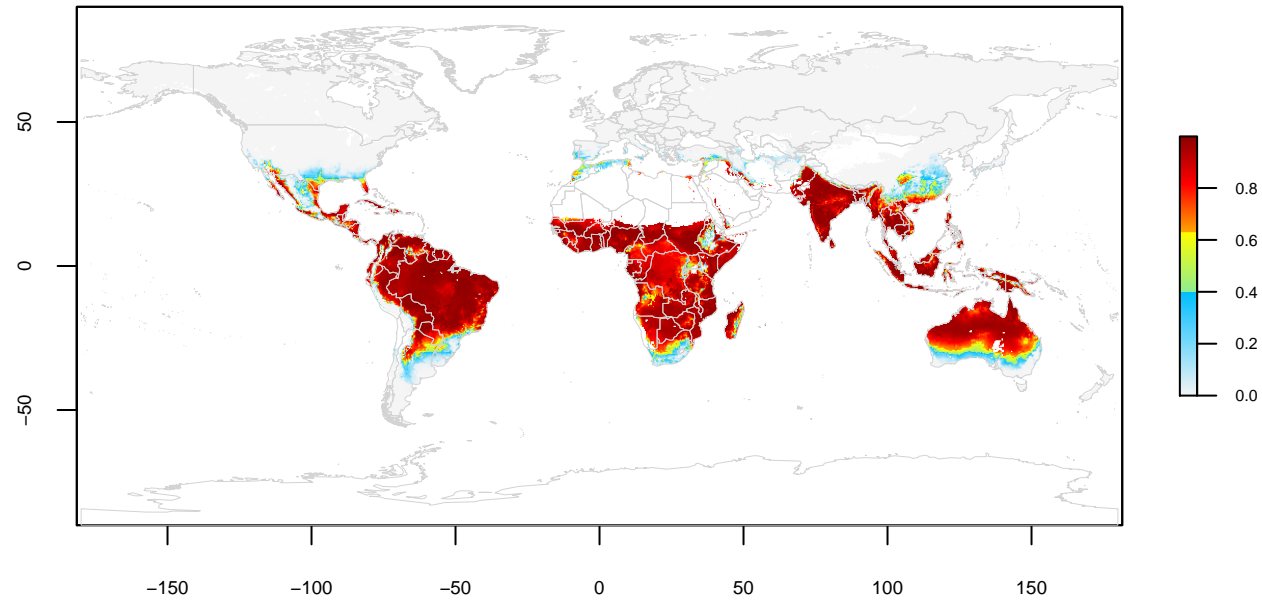

Pupal performance; Feb

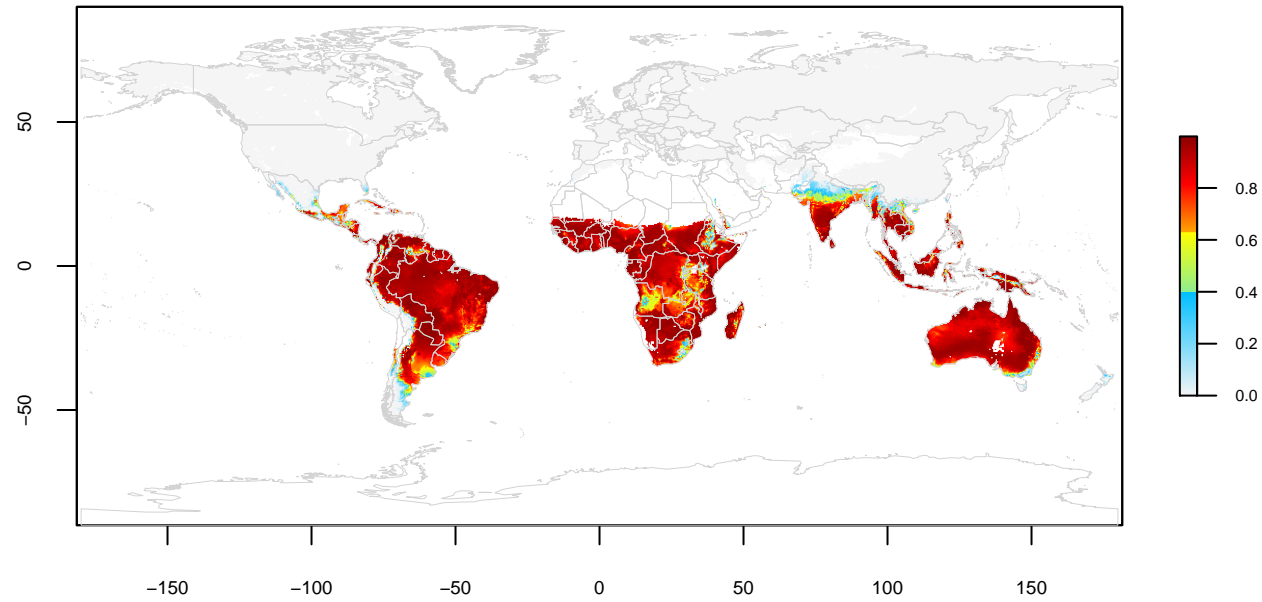

Pupal performance; Mar

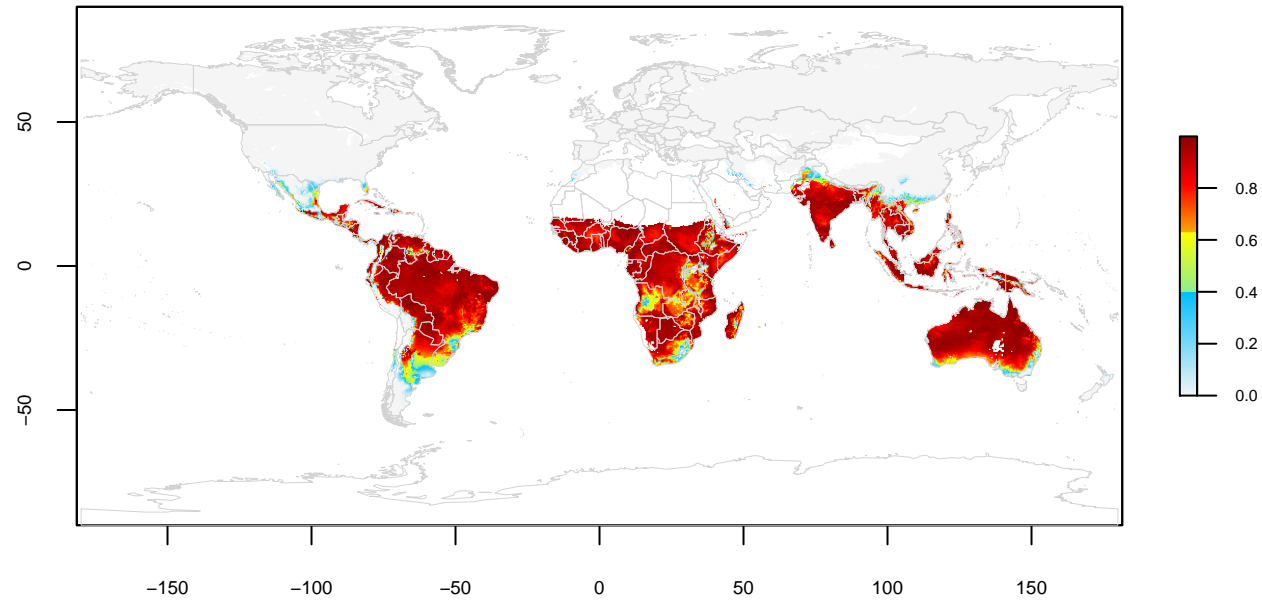

Pupal performance; Apr

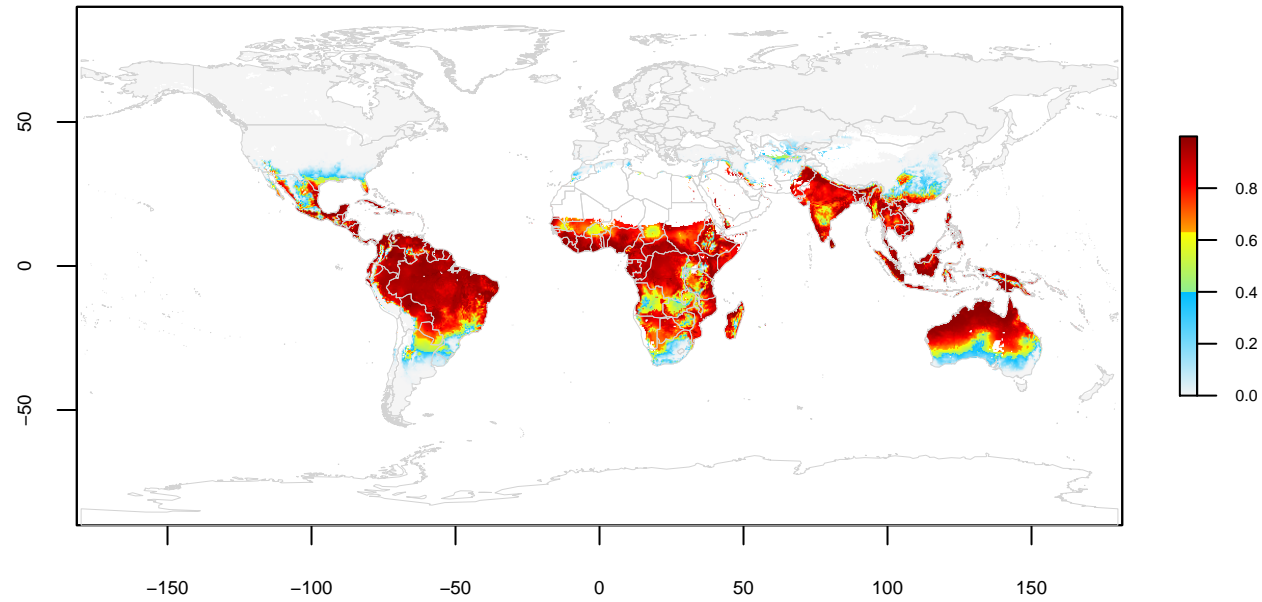

### Pupal performance; May

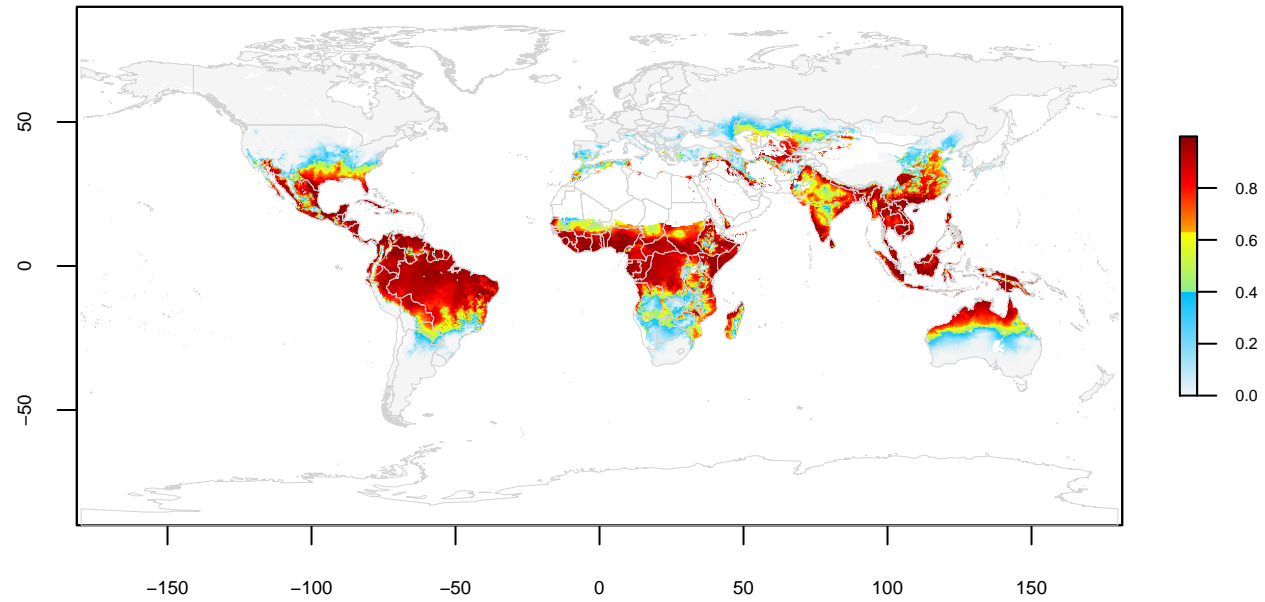

Pupal performance; Jun

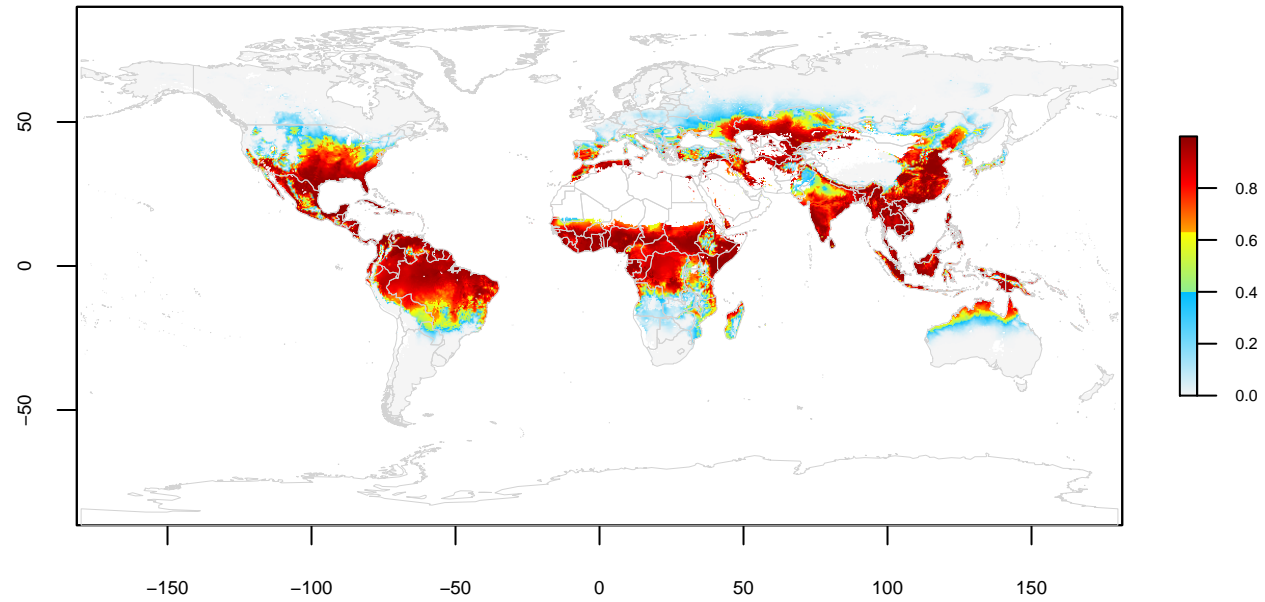

Pupal performance; Jul

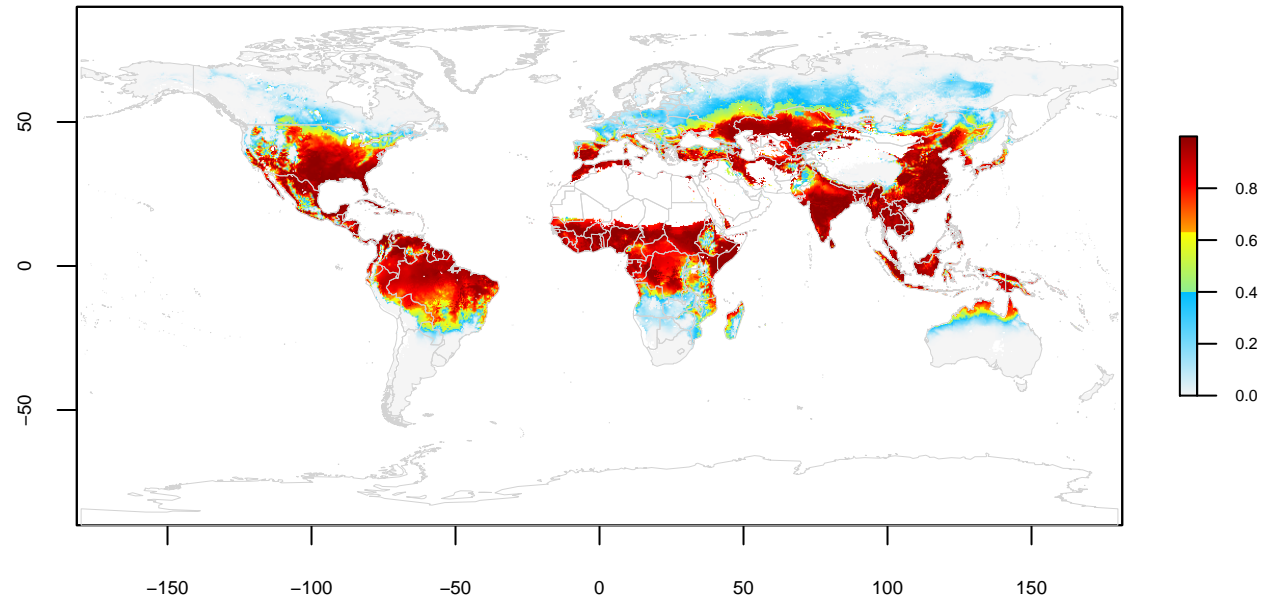



Pupal performance; Aug

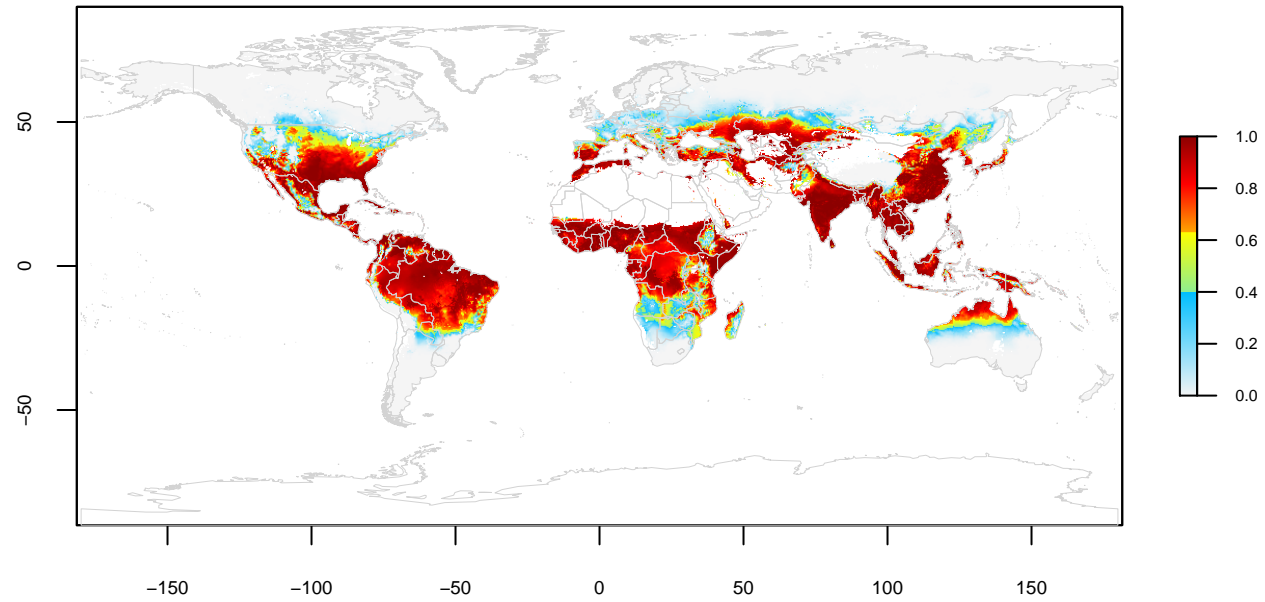

Pupal performance; Sep

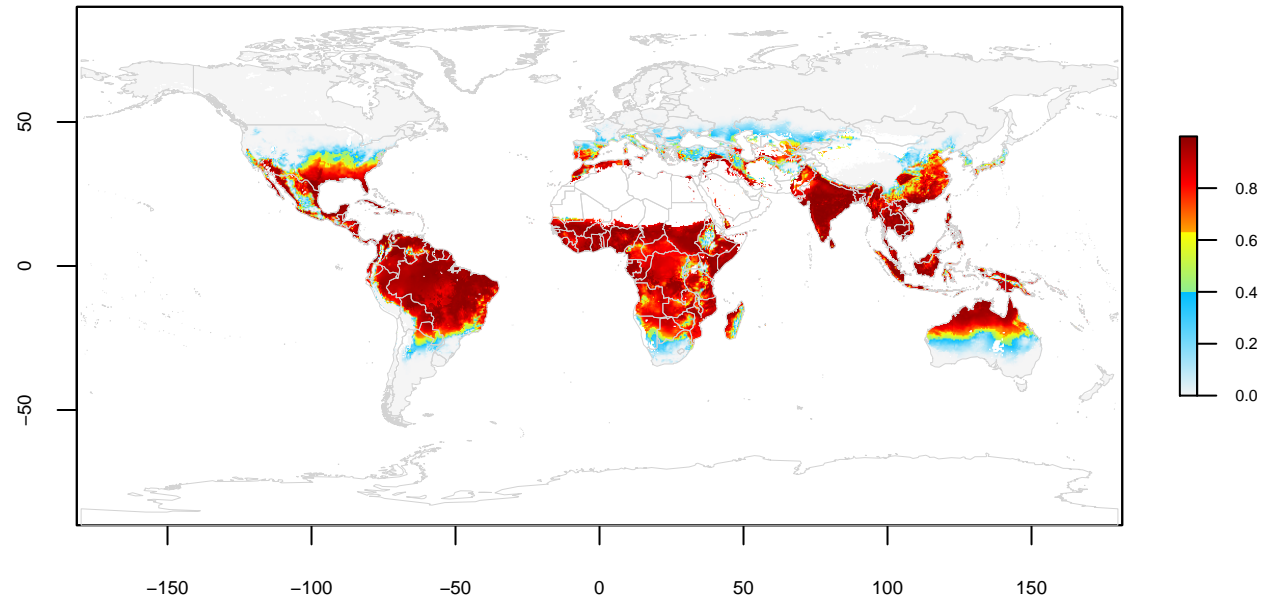

Pupal performance; Oct

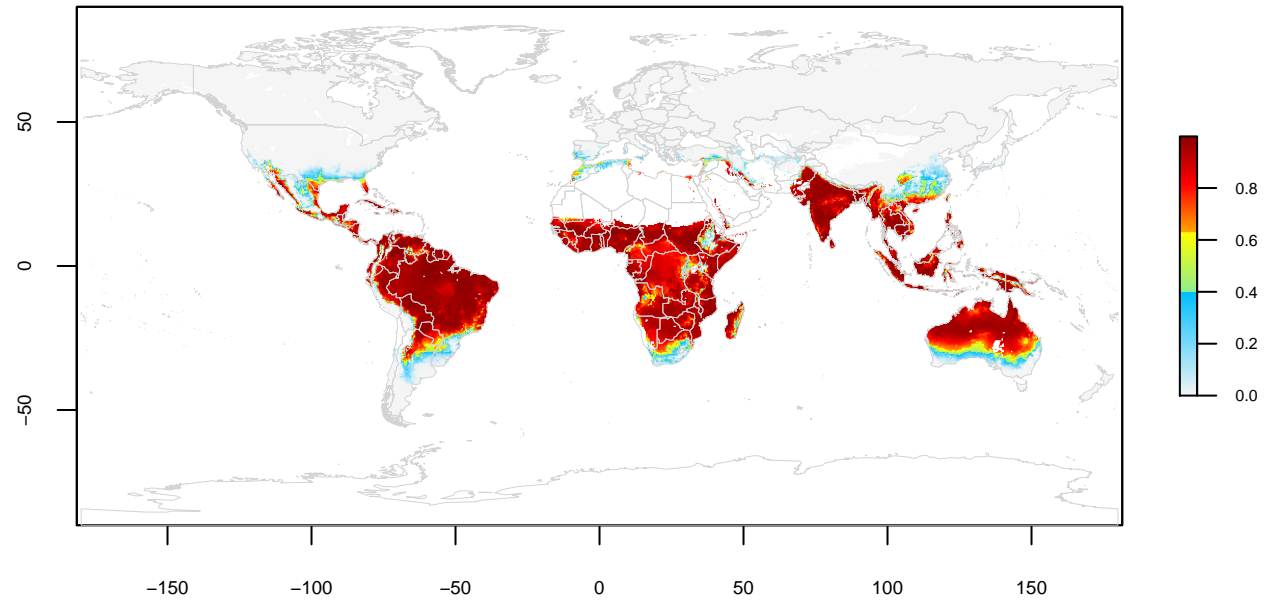

### Pupal performance; Nov

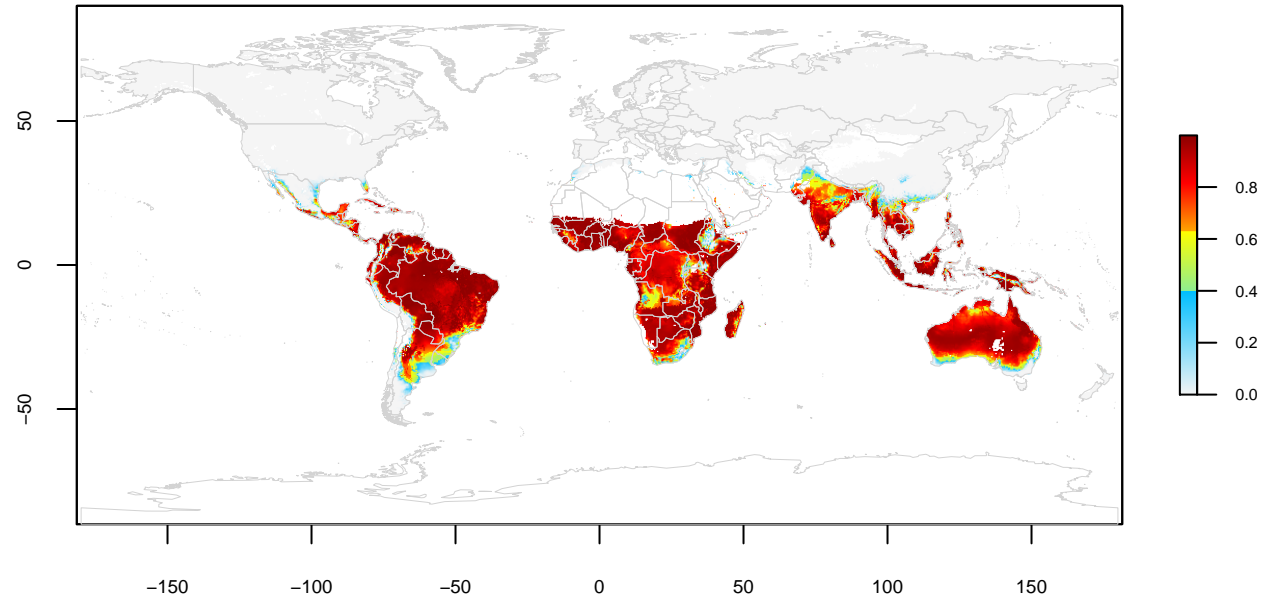

Pupal performance; Dec

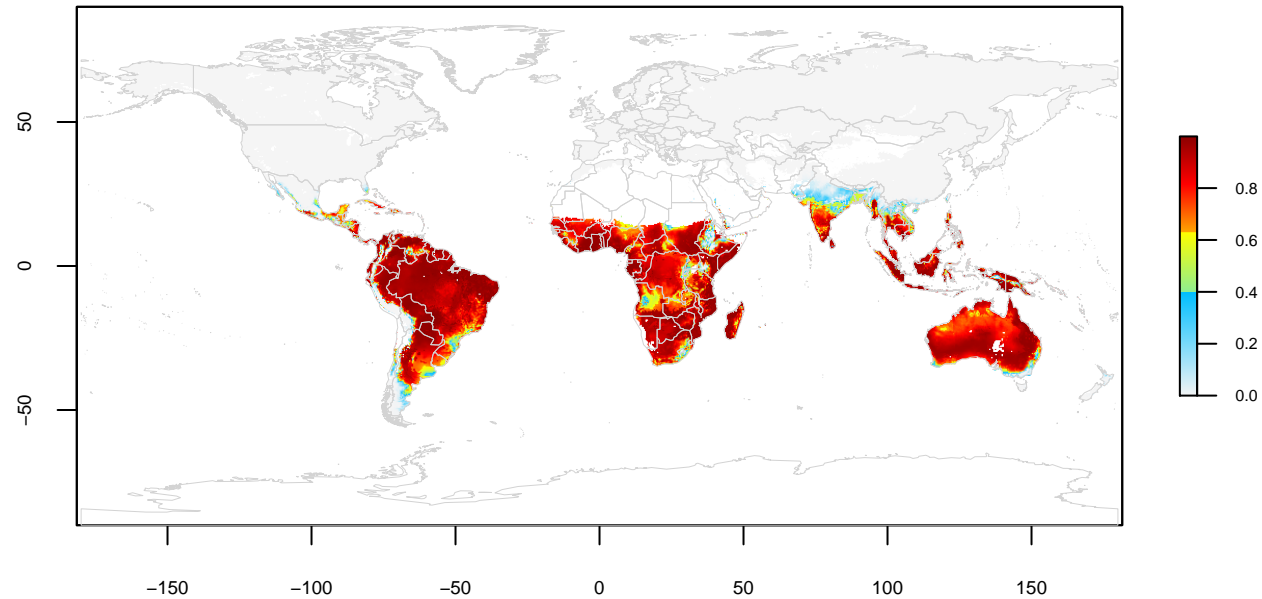

Supplement: GCB-25-3642-s004.pdf [file GCB-25-3642-s004.pdf]
